# Supplementary material for: Unraveling the link between customer incivility and proactive customer service performance: a moderated mediation model of proactive personality and emotional exhaustion
Source: Research Square preprint supplement (doi:10.21203/rs.3.rs-8786915/v1), 2026-02-16
Supplement: Supplementary file 1 [file e44ff3b446c31be806df8007.docx]

**Appendix. Scales for data collection**

| Items |  |
| --- | --- |
|  | *Customer incivility* (Wilson & Holmvall, 2013) |
| 1 | Customers continued to complain despite your efforts to assist them. |
| 2 | Customers made gestures (e.g., eye rolling, sighing) to express their impatience. |
| 3 | Customers grumbled to you about slow service during busy times. |
| 4 | Customers made negative remarks to you about your organization. |
| 5 | Customers blamed you for a problem you did not cause. |
| 6 | Customers used an inappropriate manner of addressing you. |
| 7 | Customers failed to acknowledge your efforts when you have gone out of your way to help them. |
| 8 | Customers grumbled to you that there were too few employees working. |
| 9 | Customers complained to you about the value of goods and services. |
| 10 | Customers made inappropriate gestures to get your attention (e.g., snapping fingers). |
|  |  |
|  | *Emotional exhaustion*(Maslach & Jackson, 1981) |
| 1 | I feel emotionally drained from my work. |
| 2 | I feel used up at the end of the workday. |
| 3 | I feel fatigued when I get up in the morning and have to face another day on the job. |
| 4 | Working with people all day is really a strain for me. |
| 5 | I feel burned out from my work. |
| 6 | I feel frustrated by my job. |
| 7 | I feel I am working too hard on my job. |
| 8 | I feel like I am at the end of my rope. |
|  |  |
|  | *Proactive customer service performance* (Rank et al*.*, 2007) |
| 1 | My staff member proactively shares information with customers to meet their financial needs. |
| 2 | My staff member anticipates issues or needs customers might have and proactively develops solutions. |
| 3 | My staff member uses own judgment and understanding of risk to determine when to make exceptions or improvise solutions. |
| 4 | My staff member takes ownership by following through with the customer interaction and ensures a smooth transition to other service representatives. |
| 5 | My staff member actively creates partnerships with other service representatives to better serve customers. |
| 6 | My staff member takes initiative to communicate client requirements to other service areas and collaborates in implementing solutions. |
| 7 | My staff member proactively checks with customers to verify that customer expectations have been met or exceeded. |
|  |  |
|  | *Proactive personality* Bateman and Crant (1993) |
| 1 | I am constantly on the lookout for new ways to improve my life. |
| 2 | Whatever I have been, I have been a powerful force for constructive change. |
| 3 | Nothing is more exciting than seeing my ideas turn into reality. |
| 4 | If I see something I don’t like, I fix it. |
| 5 | I excel at identifying opportunities. |
| 6 | I am always looking for better ways to do things. |
|  |  |
